# Supplementary material
Source: PubMed Central journal article supplement (PMC6287863)
Supplement: ASN.2018070740SupplementaryData1.pdf [file ASN.2018070740SupplementaryData1.pdf]

## SUPPLEMENTAL MATERIAL

### **Dose-dependent impact of enzyme replacement therapy on anti-drug antibody titers and clinical outcome in patients with Fabry disease**

Malte Lenders, PhD<sup>1\*</sup>; Leon Paul Neußer<sup>1\*</sup>; Michael Rudnicki, MD<sup>2</sup>; Peter Nordbeck, MD<sup>3</sup>; Sima Canaan-Kühl, MD<sup>4</sup>; Albina Nowak, MD<sup>5</sup>; Markus Cybulla, MD<sup>6</sup>; Boris Schmitz, PhD<sup>7</sup>; Jan Lukas, PhD<sup>8</sup>; Christoph Wanner, MD<sup>3</sup>; Stefan-Martin Brand, MD, PhD<sup>7</sup>; Eva Brand, MD, PhD<sup>1</sup>

<sup>1</sup>Internal Medicine D, Department of Nephrology, Hypertension and Rheumatology, University Hospital Muenster, Muenster, Germany

<sup>2</sup>Department of Internal Medicine IV - Nephrology and Hypertension, Medical University Innsbruck, Innsbruck, Austria

<sup>3</sup>Department of Internal Medicine I, Comprehensive Heart Failure Center, and Fabry Center for Interdisciplinary Therapy (FAZIT), University Hospital and University of Wuerzburg, Wuerzburg, Germany

<sup>4</sup>Department of Medicine, Division of Nephrology, Charité, Campus Virchow-Klinikum, Berlin, Germany,

<sup>5</sup>University Heart Center, Cardiology Department, University Hospital of Zurich and University of Zurich, Zurich, Switzerland

<sup>6</sup>FGM, Center of Internal Medicine, Department of Nephrology and Rheumatology, Muellheim, Germany

<sup>7</sup>Institute of Sports Medicine, Molecular Genetics of Cardiovascular Disease, University Hospital Muenster, Muenster, Germany

<sup>8</sup>Albrecht-Kossel-Institute for Neuroregeneration, University Rostock Medical Center, Rostock, Germany

\*Authors contributed equally.

#### **Contents:**

Supplemental Figure 1: Isolation of human total IgG antibodies from patients with FD.

Supplemental Figure 2: Detection of infused enzyme in patient 9.

Supplemental Figure 3: Comparison of required amount of enzyme due to ADA titers between patients receiving agalsidase-alfa or agalsidase-beta.

Supplemental Table 1: Genetic and biochemical data.

Supplemental Table 2: Outcomes of antibody measurements and titrations.

Supplemental Table 3: Comparison of clinical baseline characteristics, neutralizing ADAs and ERT doses between saturated and not saturated patients.

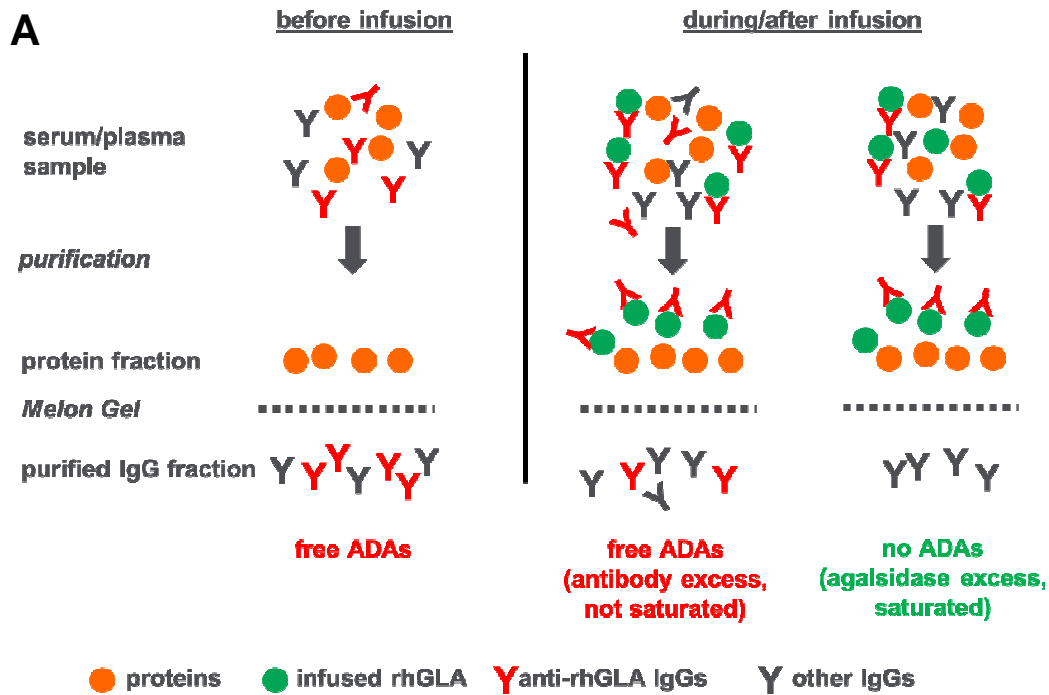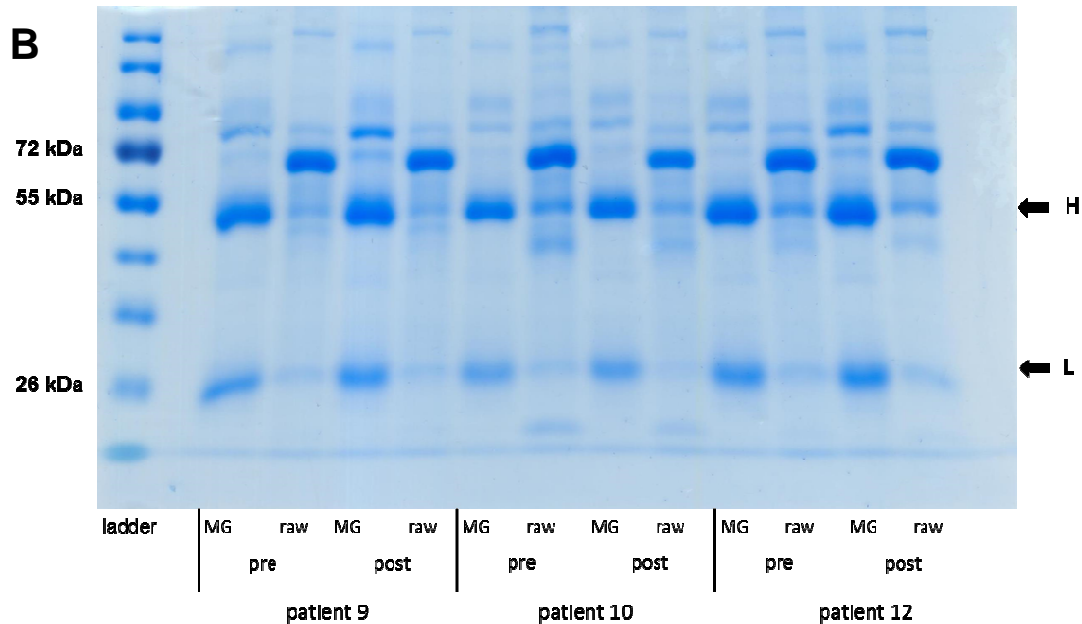

**Supplemental Figure 1: Isolation of human total IgG antibodies from patients with FD.** A) Schematic overview of the purification of IgGs from human serum/plasma samples before and after infusions. B) Representative Coomassie blue staining from pure serum (raw) samples and melon gel-purified IgG (MG) fractions (each 5 µg) before (pre) and after (post) infusions show typical pattern of heavy (H) and light (L) Fc chains in purified IgG samples.

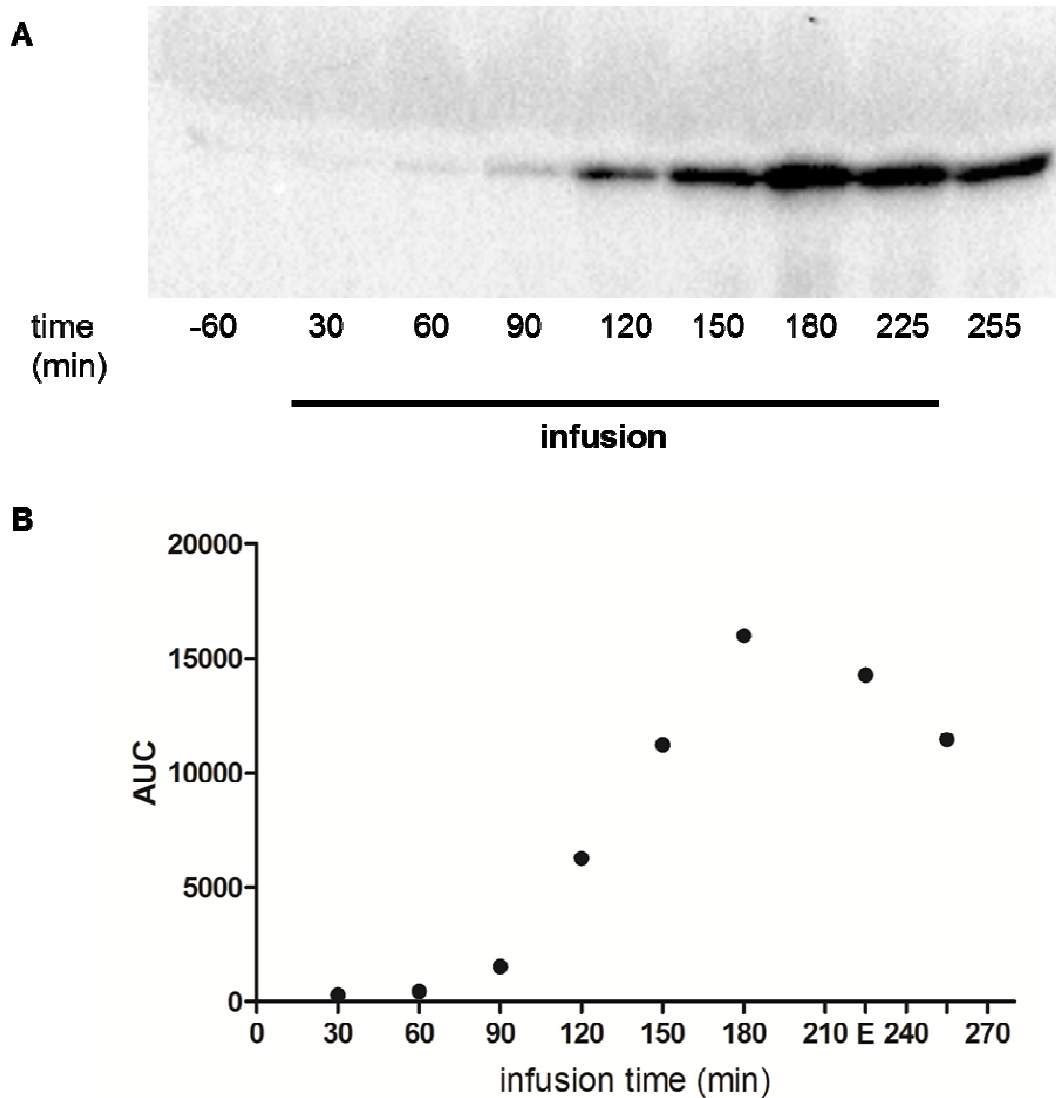

**Supplemental Figure 2: Detection of infused enzyme in patient 9.** A) Western-blot analysis of serum samples during infusions. Blood samples were drawn every 30 minutes or as indicated during infusion. Each lane was loaded with 1  $\mu$ l serum. B) Densitometry analysis of western-blots. AUC: area under the curve. E: end of infusion.

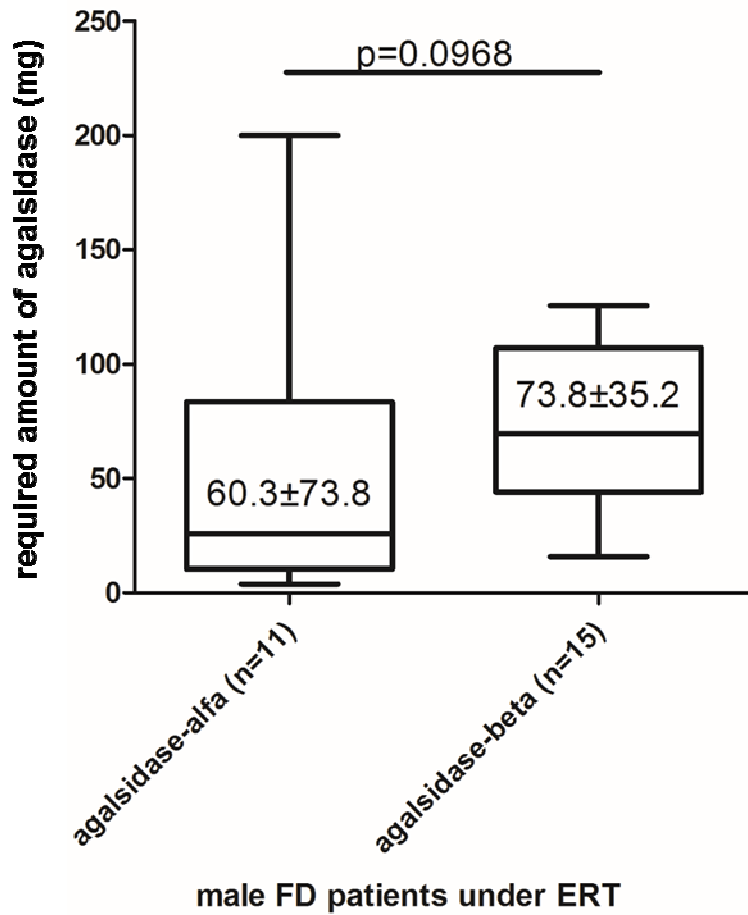

**Supplemental Figure 3: Comparison of required amount of enzyme due to ADA titers between patients receiving agalsidase-alfa or agalsidase-beta.** Data are presented as median with range. Numbers present mean±SD. ERT: enzyme replacement therapy. FD: Fabry disease. n: number of patients.

**Supplemental Table 1: Genetic and biochemical data.**

| <b>Patient</b> | <b>GLA mutation (position)</b> | <b>Enzymatic activity (%)</b> |
|----------------|--------------------------------|-------------------------------|
| 1              | c.902G>C [p.R301Q]             | 67*                           |
| 2              | c.739T>C [p.S247P]             | <5*                           |
| 3              | c.1090_1103del [p.Y365CfsX5]   | <24                           |
| 4              | c.881T>C [p.L294S]             | 12                            |
| 5              | c.658C>T [p.R220X]             | 28                            |
| 6              | c.658C>T [p.R220X]             | 12                            |
| 7              | c.762ins282bp                  | <5*                           |
| 8              | c.281G>C [p.C94S]              | 12                            |
| 9              | c.723dupT [p.Ile242fs*8]       | <5                            |
| 10             | c.679 C>T [p.R227X]            | 0                             |
| 11             | c.679C>T [p.R227X]             | <5                            |
| 12             | c.702...709 del8bp             | 9                             |
| 13             | c.IVS2-2A>G                    | 4                             |
| 14             | c.658C>T [p.R220X]             | 16                            |
| 15             | c.2T>C [p.M1T]                 | 2*                            |
| 16             | c.679 C>T [p.R227X]            | 11*                           |
| 17             | c.453C>A [p.Y151X]             | 12                            |
| 18             | c.519C>G [p.Y173X]             | 1                             |
| 19             | deletion in exon 7             | <5*                           |
| 20             | c.1047G>A [p.W349X]            | 2                             |
| 21             | c.658C>T [p.R220X]             | 3                             |
| 22             | c.605G>A [p.C202Y]             | 8                             |
| 23             | c.679C>T [p.R227X]             | 4                             |
| 24             | c.272T>C [p.I91T]              | <5                            |
| 25             | c.1208delAAG                   | <1                            |
| 26             | c.718_719delAA                 | 5                             |
| <b>total</b>   |                                |                               |
| <b>26</b>      | <b>6 missense; 20 nonsense</b> | <b>16 &lt;5%</b>              |

\*Only plasma GLA activities available. Nonsense mutations have been defined as nucleotide exchanges/insertions/deletions resulting in stop codons, frame shifts, large and small deletions or splice site mutations.

**Supplemental Table 2: Outcomes of antibody measurements and titrations.**

| patient and measures | time under ERT (months) | treatment, amount of agalsidase -alfa ( $\alpha$ ) or -beta ( $\beta$ ) | amount infused ERT (mg) | status after infusion (saturated / not saturated) | required amount of agalsidase-alfa (mg) | required amount of agalsidase-beta (mg) |
|----------------------|-------------------------|-------------------------------------------------------------------------|-------------------------|---------------------------------------------------|-----------------------------------------|-----------------------------------------|
| 1                    | 63                      | $\alpha$                                                                | 17.5                    | saturated                                         | 2.1                                     | 5.7                                     |
| 2                    | 54                      | $\alpha$                                                                | 14                      | not saturated                                     | >200                                    | >200                                    |
| 3                    | 46                      | $\alpha$                                                                | 14                      | saturated                                         | 11.7                                    | 13.2                                    |
| 4                    | 114                     | $\beta$                                                                 | 70                      | not saturated                                     | 128.4                                   | 115.9                                   |
| 5                    | 192                     | $\beta$                                                                 | 70                      | saturated                                         | 66.5                                    | 71.3                                    |
| 6                    | 192                     | $\beta$                                                                 | 70                      | not saturated                                     | 115.4                                   | 135.7                                   |
| 7                    | 190                     | $\beta$                                                                 | 70                      | supersaturated                                    | 72.0                                    | 67.2                                    |
| 8.1                  | 92                      | $\alpha$                                                                | 14                      | no sample                                         | 21.3                                    | 22.8                                    |
| 8.2                  | 117                     | $\alpha$                                                                | 14                      | no sample                                         | 22.1                                    | 16.6                                    |
| 8.3                  | 133                     | $\beta$                                                                 | 70                      | no sample                                         | 45.6                                    | 41.3                                    |
| 8.4                  | 153                     | $\beta$                                                                 | 70                      | no sample                                         | 51.9                                    | 57.8                                    |
| 8.5                  | 153                     | $\beta$                                                                 | 70                      | saturated                                         | 54.6                                    | 53.9                                    |
| 9.1                  | 7                       | $\beta$                                                                 | 70                      | saturated                                         | 52.1                                    | 57.0                                    |
| 9.2                  | 8                       | $\beta$                                                                 | 35                      | not saturated                                     | 77.9                                    | 78.0                                    |
| 9.3                  | 11                      | $\beta$                                                                 | 70                      | not saturated                                     | 82.2                                    | 92.4                                    |
| 9.4                  | 11                      | $\beta$                                                                 | 105                     | saturated                                         | 89.9                                    | 92.4                                    |
| 9.5                  | 12                      | $\beta$                                                                 | 70                      | not saturated                                     | 84.6                                    | 95.4                                    |
| 9.6                  | 13                      | $\beta$                                                                 | 70                      | not saturated                                     | 90.3                                    | 102.0                                   |
| 10.1                 | 79                      | $\alpha$                                                                | 17.5                    | no sample                                         | 39.7                                    | 57.4                                    |
| 10.2                 | 92                      | $\alpha$                                                                | 17.5                    | no sample                                         | 25.8                                    | 44.8                                    |
| 10.3                 | 145                     | $\beta$                                                                 | 70                      | saturated                                         | 47.6                                    | 40.6                                    |
| 10.4                 | 167                     | $\beta$                                                                 | 70                      | saturated                                         | 28.3                                    | 53.2                                    |
| 11                   | 8                       | $\beta$                                                                 | 70                      | saturated                                         | 44.0                                    | 39.8                                    |
| 12                   | 43                      | $\alpha$                                                                | 14                      | saturated                                         | 4.7                                     | 6.8                                     |
| 13                   | 92                      | $\alpha$                                                                | 14                      | saturated                                         | 12.0                                    | 8.6                                     |
| 14                   | 130                     | $\beta$                                                                 | 70                      | saturated                                         | 18.0                                    | 13.7                                    |
| 15.1                 | 95                      | $\alpha$                                                                | 14                      | not saturated                                     | 43.5                                    | 41.6                                    |
| 15.2                 | 95                      | $\beta$                                                                 | 60                      | saturated                                         | 35.4                                    | 37.8                                    |
| 15.3                 | 95                      | $\beta$                                                                 | 60                      | saturated                                         | 51.8                                    | 55.2                                    |
| 15.4                 | 96                      | $\beta$                                                                 | 60                      | not saturated                                     | 92.2                                    | 92.2                                    |
| 15.5                 | 97                      | $\beta$                                                                 | 60                      | not saturated                                     | 142.1                                   | 159.6                                   |
| 15.6                 | 98                      | $\beta$                                                                 | 60                      | not saturated                                     | 165.3                                   | 184.8                                   |
| 16                   | 204                     | $\beta$                                                                 | 70                      | not saturated                                     | 108.9                                   | 105.4                                   |
| 17.1                 | 13                      | $\alpha$                                                                | 14                      | not saturated                                     | 76.9                                    | 90.1                                    |
| 17.2                 | 16                      | $\alpha$                                                                | 14                      | not saturated                                     | 68.4                                    | 73.5                                    |
| 18                   | 122                     | $\beta$                                                                 | 105                     | saturated                                         | 72.9                                    | 81.9                                    |
| 19                   | 162                     | $\beta$                                                                 | 70                      | not saturated                                     | 101.8                                   | 110.5                                   |
| 20                   | 47                      | $\alpha$                                                                | 14                      | saturated                                         | 10.8                                    | 11.8                                    |
| 21.1                 | 191                     | $\alpha$                                                                | 17.5                    | not saturated                                     | 76.8                                    | 58.9                                    |
| 21.2                 | 200                     | $\beta$                                                                 | 35                      | not saturated                                     | 66.0                                    | 61.8                                    |
| 21.3                 | 201                     | $\beta$                                                                 | 70                      | saturated                                         | 62.5                                    | 59.2                                    |
| 22.1                 | 13                      | $\beta$                                                                 | 55                      | saturated                                         | 29.7                                    | 23.8                                    |

|              |                |          |                 |               |                    |                    |
|--------------|----------------|----------|-----------------|---------------|--------------------|--------------------|
| 22.2         | 16             | $\beta$  | 55              | saturated     | 14.6               | 11.9               |
| 23           | 24             | $\beta$  | 80              | not saturated | 114.0              | 119.4              |
| 24           | 12             | $\alpha$ | 14              | not saturated | 24.5               | 27.4               |
| 25           | 181            | $\beta$  | 70              | not saturated | 73.8               | 78.6               |
| 26           | 46             | $\alpha$ | 14              | not saturated | >200               | >200               |
| <b>total</b> |                |          |                 |               |                    |                    |
| <b>47</b>    | <b>95</b>      |          | <b>60</b>       |               | <b>62.5</b>        | <b>58.9</b>        |
|              | <b>[7-204]</b> |          | <b>[14-105]</b> |               | <b>[2.1-200.0]</b> | <b>[5.7-200.0]</b> |

ERT: enzyme replacement therapy.

**Supplemental Table 3: Comparison of clinical baseline characteristics, neutralizing ADAs and ERT doses between saturated and not saturated patients.**

| measure                                           | saturated<br>(n=14) | not<br>saturated<br>(n=12) | delta/ RR<br>[95%CI]          | p-value       |
|---------------------------------------------------|---------------------|----------------------------|-------------------------------|---------------|
| age at ERT initiation, years                      | 32±13               | 32±11                      | -0.6<br>[95%CI -10.5 to 9.3]  | 0.9082        |
| treatment duration, months                        | 89±66               | 107±76                     | -18<br>[95%CI -75 to 39]      | 0.5242        |
| missense mutations, n                             | 3 (21.4)            | 3 (25.0)                   | 0.91<br>[95%CI 0.37 to 2.22]  | 0.9999        |
| initial treatment with<br>agalsidase-alfa, n      | 8 (57.1)            | 6 (50.0)                   | 1.14<br>[95%CI 0.55 to 2.36]  | 0.9999        |
| current treatment with<br>agalsidase-alfa, n      | 5 (35.7)            | 6 (50.0)                   | 0.76<br>[95%CI 0.35 to 1.63]  | 0.6922        |
| current total dose per<br>infusion, mg            | 52±31               | 43±30                      | 9<br>[95%CI -16 to 33]        | 0.4788        |
| required amount of enzyme<br>to saturate ADAs, mg | 36±26               | 106±54                     | -71<br>[95%CI -104 to -37]    | <b>0.0002</b> |
| lyso-Gb3 at baseline, ng/ml                       | 77±49               | 79±57                      | -1.4<br>[95%CI -44.3 to 41.5] | 0.9461        |
| eGFR at baseline,<br>ml/min/1.73 m <sup>2</sup>   | 105±43              | 102±37                     | 3.2<br>[95%CI -29.7 to 36.1]  | 0.8439        |
| IVSd at baseline, mm                              | 13±2                | 11±3                       | 1.89<br>[95%CI 0.01 to 3.78]  | <b>0.0489</b> |

Values are given as mean±SD, or n (%). If no data at ERT-naïve baseline were available, the earliest available (after ERT-initiation) value was assessed. ADA: anti-drug antibody, eGFR: estimated glomerular filtration rate, Gb3: globotriaosylceramide, IVSd: interventricular septum thickness in diastole.
